# Supplementary material
Source: publisher site journal article supplement (https://static.cambridge.org/content/id/urn:cambridge.org:id:article:S1041610218001357/resource/name/S1041610218001357supp001.docx)
Supplement: Supplementary file 1 [file S1041610218001357supp001.docx]

**Time for Dementia**

**Family qualitative interviews**

**Topic Guide**

***Motivators***

*Can you tell me what motivated you to take part in the programme? What did you expect? Has the programme lived up to your expectations, if not, what has been different? Has this been positive or negative?*

**Experience**

*Tell us about the last visit you had? Were there any significant moments for you? How has it changed over time?*

**Learning**

*Do you have a sense of what the students have learnt about dementia? Do you think that anything could be done (by you, by the students, by the universities) to help the students get more from the visits?*

**Being involved**

*Has there been any value to you both in being involved? What keeps you involved? Going forward, we willing be continuing with the programme, would you be likely to continue?*

**Relationship**

*How would you describe the relationship with the students? (If very good or indifferent – explore the components of this – eg why is this? What makes it work? How would you like it to be different? What might help for it to be different) How did this change over time?*

**Management of the programme**

*Are there any issues with the administration of the programme?*
